# Supplementary material for: Transcriptomic microRNA Profiling of Dendritic Cells in Response to Gut Microbiota-Secreted Vesicles
Source: MDPI journal article supplement (doi:10.3390/cells9061534), 2020-06-23

### miRNAs differentially Down-regulated only by EcN MVs

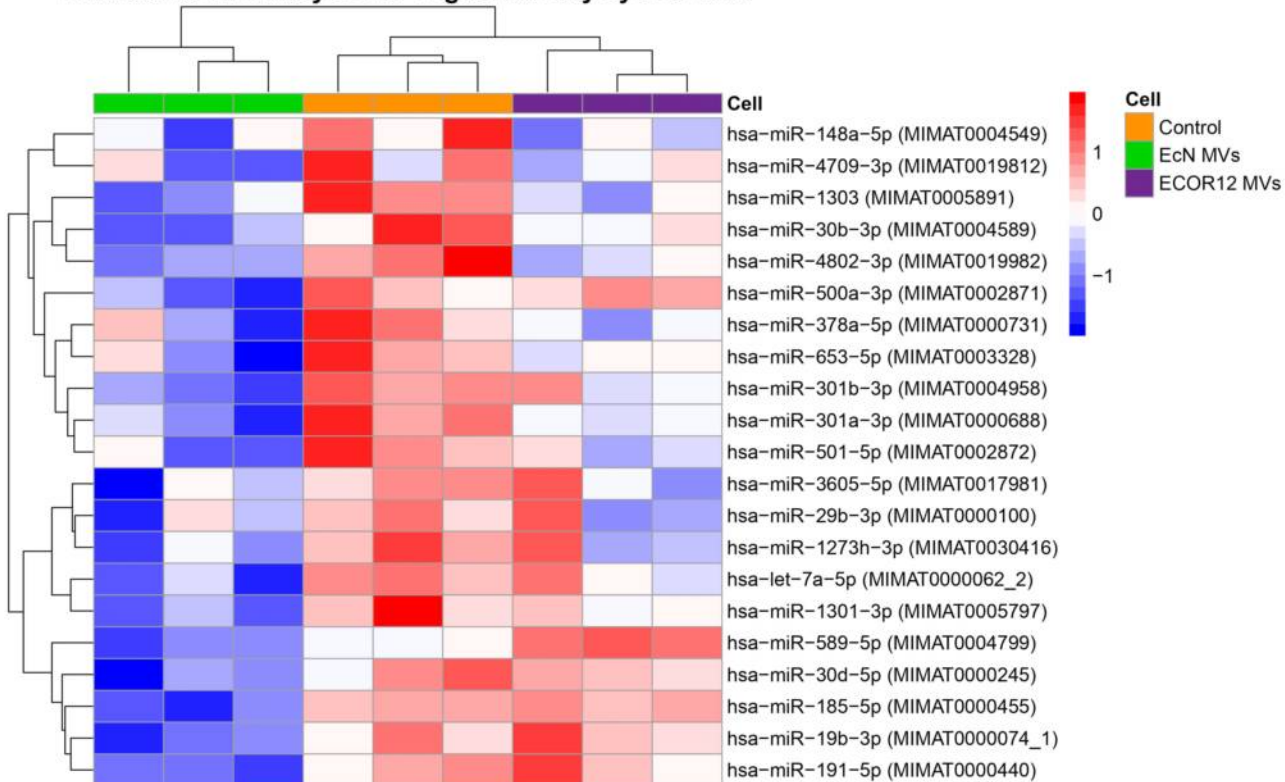

### miRNAs differentially Down-regulated only by EcN MVs

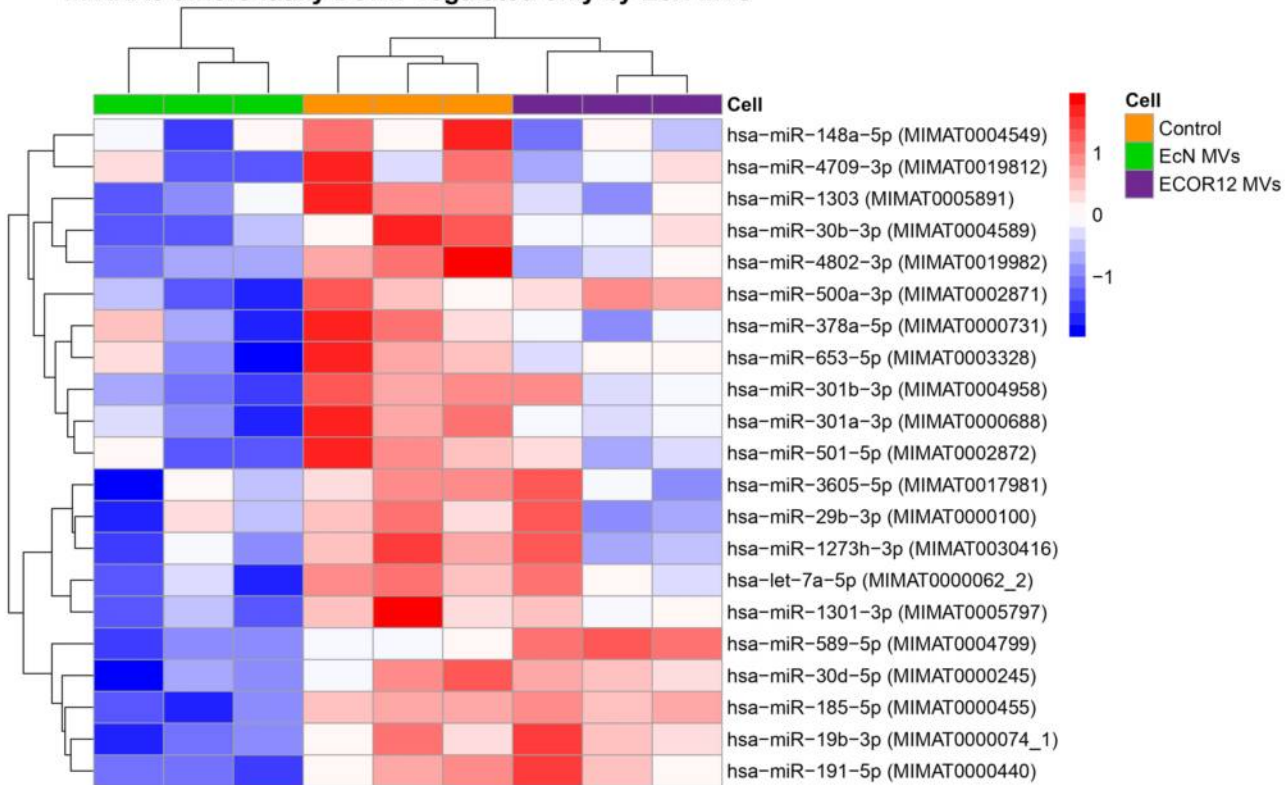

Supplement: s1 [file s1]
