# Supplementary figures and images for: Transcriptomic microRNA Profiling of Dendritic Cells in Response to Gut Microbiota-Secreted Vesicles
Source: MDPI journal article supplement (doi:10.3390/cells9061534), 2020-06-23

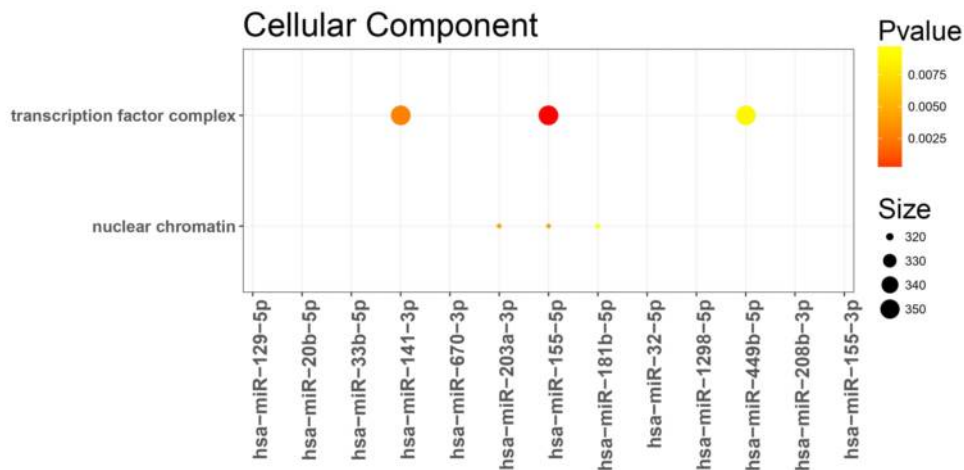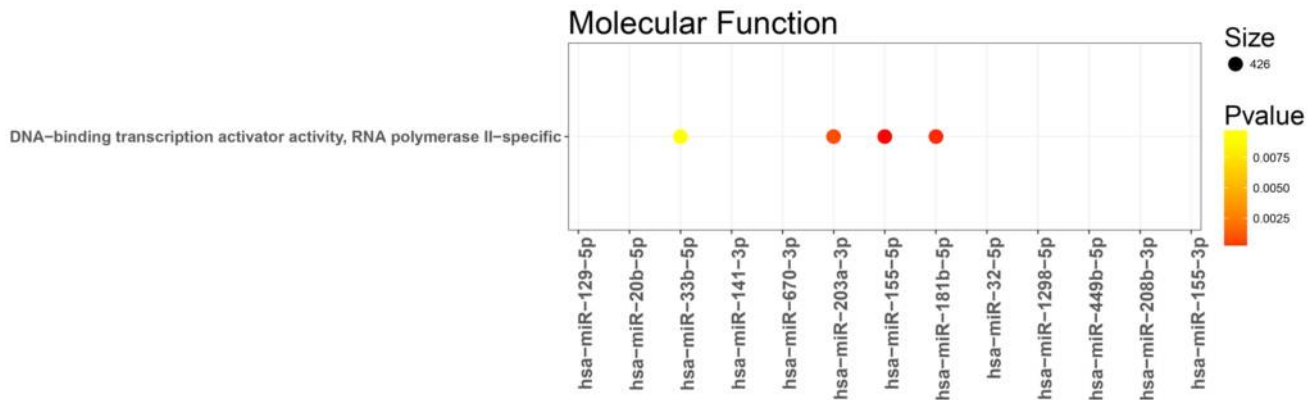

Supplement: s1 [file s1]

## Maturation Analysis

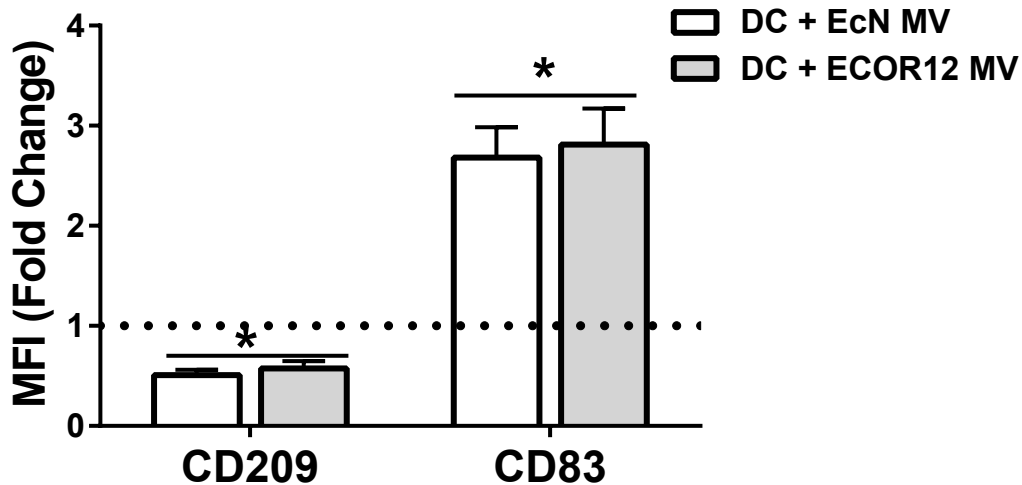

Supplement: s1 [file s1]

Common Down-regulated miRNAs by EcN MVs and ECOR12 MVs

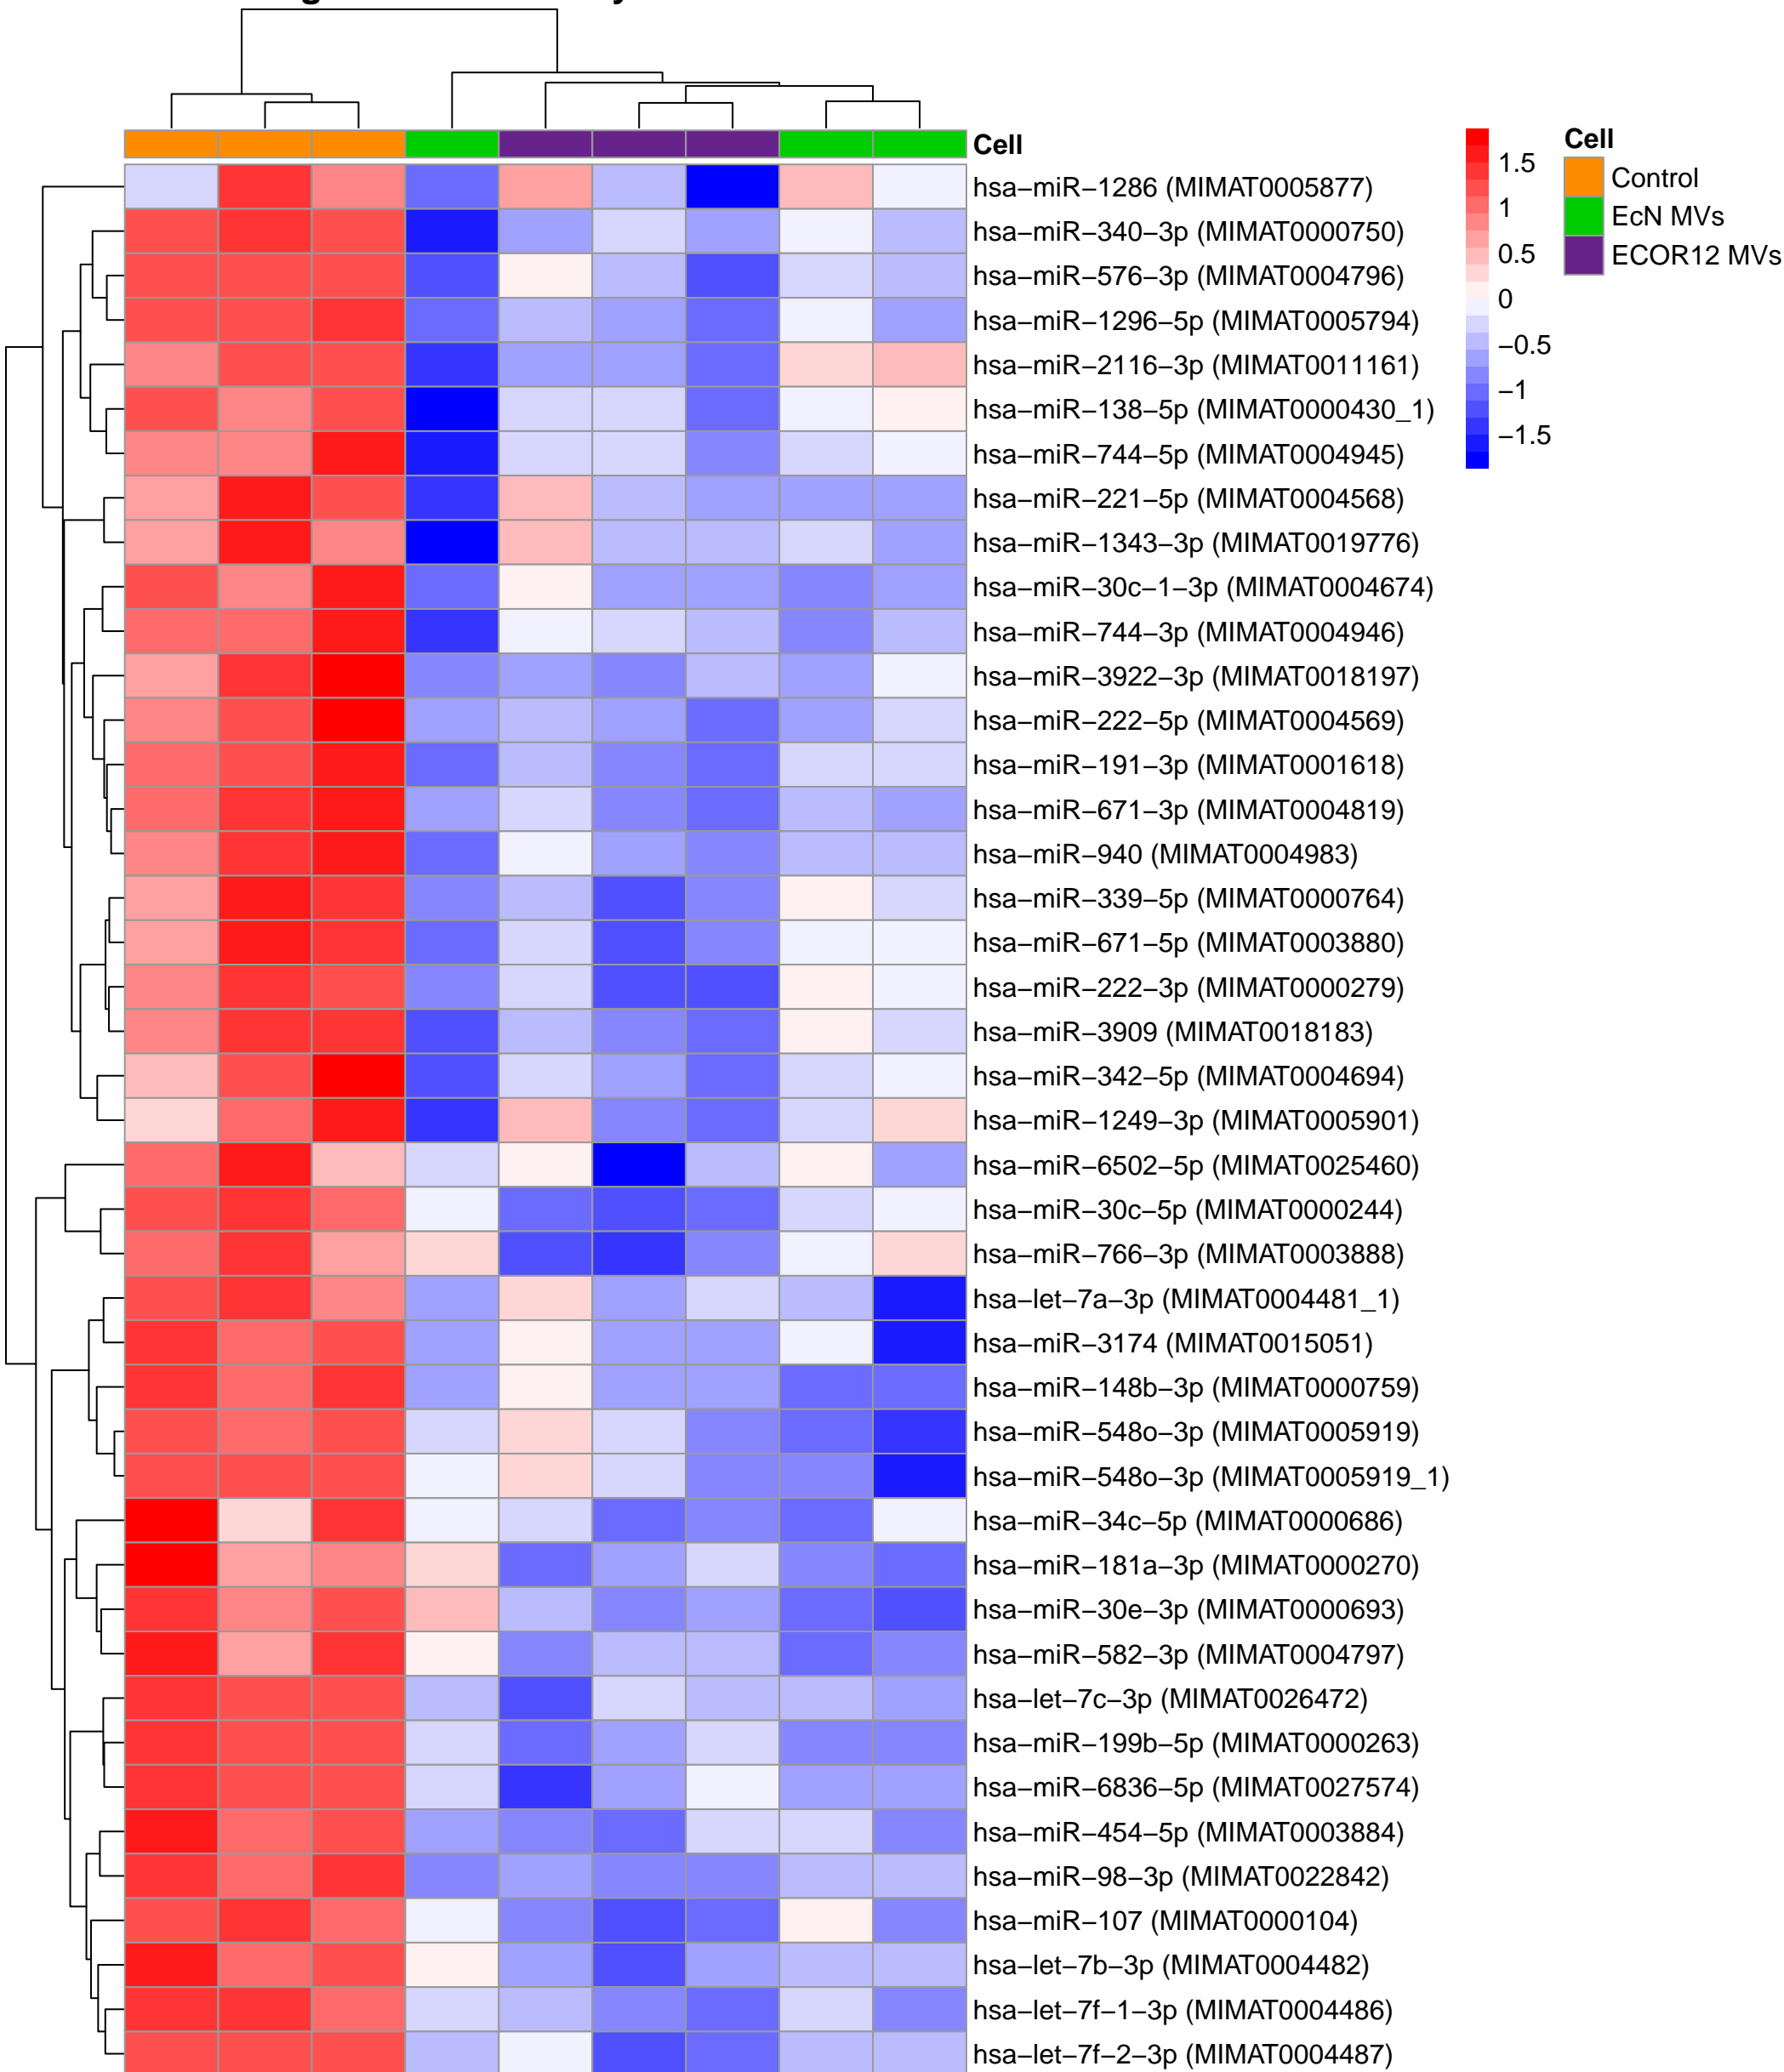

Supplement: s1 [file s1]
